# Supplementary material
Source: PubMed Central journal article supplement (PMC2324065)
Supplement: NIHMS38501-supplement-01.pdf [file NIHMS38501-supplement-01.pdf]

**Supplementary materials for the article “The 14-year course of alcoholism in a community sample: Do men and women differ?” published in *Drug and Alcohol Dependence***

**Ellen L. Edens<sup>a,\*</sup>, Anne L. Glowinski<sup>a</sup>, Kyle L. Grazier<sup>b</sup>, Kathleen K. Bucholz<sup>a</sup>**

<sup>a</sup> *Department of Psychiatry, Washington University in St. Louis, 4560 Clayton, Ste. 1000 St. Louis, MO 63110, USA*

<sup>b</sup> *Department of Health Management and Policy, University of Michigan, 109 Observatory, M3533 SPH II, Ann Arbor, MI 48109, USA*

Received 8 February 2007; received in revised form 1 August 2007

This material supplements but does not replace the content of the peer-reviewed paper published in *Drug and Alcohol Dependence*.

\* Corresponding author. Tel.: +1 314 286 2316; fax: +1 314 286 2243.  
E-mail address: [edense@psychiatry.wustl.edu](mailto:edense@psychiatry.wustl.edu) (E.L. Edens).

## Appendix

In our study, combining individuals *with* a history of AUDs and those *without* in forming the “ECA VHD/1t-AUDPs” comparison group can potentially cloud interpretation. However, this was the design of the 14-year ECA followup study and, as such, could not be changed. Therefore, we ran all analyses separately between the two ECA VHD/1t-AUDP groups and compared them to ECA 2t-AUDPs. It should be noted that among the male ECA VHD/1t-AUDPs, 58% (N=71) were “ECA very heavy drinkers (ECA VHDs)” and 42% (N=51) were “ECA One-time AUD Positive (ECA 1t-AUDP).” However, among the females, 90.3% (N=28) were ECA VHDs, while 9.7% (N=3) were ECA 1t-AUDPs. Thus, results for females remained the same when separating out the ECA VHDs. There were too few female ECA 1t-AUDPs for separate analysis.

Among the men, while we found higher rates of lifetime DSM-IV AA and/or AD among the ECA 1t-AUDPs compared to the ECA VHDs, the inferences remained the same; i.e. the male ECA 2t-AUDPs had significantly higher rates of DSM-IV AA and/or AD than either the male VHDs ( $p < .0001$ ) or the male ECA 1t-AUDPs ( $p < .01$ ). The male ECA 1t-AUDPs, however, did not have significant differences in lifetime DSM-IV alcohol dependence alone or AD and abuse when compared to the ECA 2t-AUDPs (see Table 2A).

We also analyzed past year rates separately for the male ECA VHD/1t-AUDPs. Again, while there were higher percentages of past-year DSM-IV AA and/or AD in the ECA 1t-AUDPs compared to VHDs, the inferences of high rates of remission when compared to the ECA 2t-AUDPs remained similar (see Table 2B).

Table 2A

Male lifetime DSM-IV alcohol use disorders (AUDs) at followup, with Group 2 subtype comparisons

|                           | <i>Group 1</i>                         | <i>Group 2</i>                      | <i>Group 3</i>    |                          |                                |                                     |                                     |                                      |                                      |
|---------------------------|----------------------------------------|-------------------------------------|-------------------|--------------------------|--------------------------------|-------------------------------------|-------------------------------------|--------------------------------------|--------------------------------------|
|                           |                                        |                                     | <i>Subtype 2A</i> | <i>Subtype 2B</i>        |                                |                                     |                                     |                                      |                                      |
|                           | <i>ECA Alc-<br/>unaffecteds</i><br>(%) | <i>ECA VHDs/<br/>1t-AUDP</i><br>(%) | <i>ECA VHDs</i>   | <i>ECA 1t-<br/>AUDPs</i> | <i>ECA<br/>2T-AUDPs</i><br>(%) | <i>Grps.<br/>1 v. 3<sup>a</sup></i> | <i>Grps.<br/>2 v. 3<sup>a</sup></i> | <i>Grps.<br/>2A v. 3<sup>a</sup></i> | <i>Grps.<br/>2B v. 3<sup>a</sup></i> |
| <b>Males</b>              | (N=105)                                | (N=122)                             | (N=71)            | (N=51)                   | (N=120)                        |                                     |                                     |                                      |                                      |
| DSM-IV                    |                                        |                                     |                   |                          |                                |                                     |                                     |                                      |                                      |
| AA and/or AD              | 22.9                                   | 54.9                                | 50.7              | 60.8                     | 79.2                           | <.0001 <sup>b</sup>                 | <.0001                              | <.0001                               | <b>0.01</b>                          |
| AA only                   | 21.0                                   | 30.3                                | 36.6              | 21.6                     | 30.8                           | 0.09                                | 0.93                                | 0.41                                 | 0.22                                 |
| AD                        | 1.9                                    | 24.6                                | 14.1              | 39.2                     | 48.3                           | <.0001                              | <.001                               | <.0001                               | 0.27                                 |
| AD and abuse <sup>c</sup> | 1.0                                    | 15.6                                | 7.0               | 27.4                     | 37.5                           | <.0001                              | <.001                               | <.0001                               | 0.21                                 |

<sup>a</sup> P-values represent differences between ECA 2t-AUDPs and respective groups using  $\chi^2$  tests

<sup>b</sup> Statistically significant findings ( $p < .05$ ) are in bold

<sup>c</sup> DSM-IV alcohol dependence (AD) does not distinguish between AD with abuse symptoms and AD without. "AD and abuse" indicates meeting criteria for both

Table 2B  
Male past year DSM-IV AUDs at followup, with Group 2 subtype comparisons

|                           | <i>Group 1</i>                         | <i>Group 2</i>                      | <i>Group 3</i>    |                         |                                |                                     |                                     |                                      |                                      |
|---------------------------|----------------------------------------|-------------------------------------|-------------------|-------------------------|--------------------------------|-------------------------------------|-------------------------------------|--------------------------------------|--------------------------------------|
|                           |                                        |                                     | <i>Subtype 2A</i> | <i>Subtype 2B</i>       |                                |                                     |                                     |                                      |                                      |
|                           | <i>ECA Alc-<br/>unaffecteds</i><br>(%) | <i>ECA VHDs/<br/>1t-AUDP</i><br>(%) | <i>ECA VHDs</i>   | <i>ECA<br/>1t-AUDPs</i> | <i>ECA<br/>2T-AUDPs</i><br>(%) | <i>Grps.<br/>1 v. 3<sup>a</sup></i> | <i>Grps.<br/>2 v. 3<sup>a</sup></i> | <i>Grps.<br/>2A v. 3<sup>a</sup></i> | <i>Grps.<br/>2B v. 3<sup>a</sup></i> |
| <b>Males</b>              | (N=103) <sup>d</sup>                   | (N=122)                             | (N=71)            | (N=51)                  | (N=120)                        |                                     |                                     |                                      |                                      |
| DSM-IV                    |                                        |                                     |                   |                         |                                |                                     |                                     |                                      |                                      |
| AA and/or AD              | 2.0                                    | 9.1                                 | 7.1               | 11.8                    | 9.3                            | <b>0.02<sup>b</sup></b>             | 0.95                                | 0.60                                 | 0.63                                 |
| AA only                   | 1.9                                    | 3.3                                 | 4.2               | 2.0                     | 3.3                            | 0.52                                | 0.98                                | 0.75                                 | 0.63                                 |
| AD                        | 0.0                                    | 5.8                                 | 2.9               | 9.8                     | 6.0                            | <b>0.01</b>                         | 0.95                                | 0.33                                 | 0.38                                 |
| AD and abuse <sup>c</sup> | 0.0                                    | 5.8                                 | 2.9               | 9.8                     | 1.7                            | 0.18                                | 0.10                                | 0.60                                 | <b>0.02</b>                          |

<sup>a</sup> P-values represent differences between ECA 2t-AUDPs and respective groups using  $\chi^2$  tests

<sup>b</sup> Statistically significant findings (p<.05) are in bold

<sup>c</sup> DSM-IV alcohol dependence (AD) does not distinguish between AD with abuse symptoms and AD without. “AD and abuse” indicates meeting criteria for both

<sup>d</sup> 4 respondents (2 males, 2 females) in the ECA alcohol-unaffected group were lifetime non-drinkers and were excluded in calculations for past year diagnoses
